# Supplementary material for: A nanozyme combining multi-enzymatic activity with targeted carbon monoxide delivery for synergistic antitumor therapy
Source: Royal Society of Chemistry journal article supplement (doi:10.1039/d5nj00380f), 2025-01-01
Supplement: d5nj00380f1.pdf [file d5nj00380f1.pdf]

*Supporting Information*

*for*

**A Nanozyme Combing Multi-Enzymatic Activity with Targeted Carbon Monoxide Delivery for Synergistic Antitumor Therapy**

Bing Ren,<sup>a</sup> Jing Liu,<sup>a</sup> Qi Tang,<sup>a</sup> Yi Wang,<sup>b</sup> Jian Fang,<sup>a</sup> Shi-Ping Yang<sup>c</sup> and Jin-Gang Liu<sup>\*a</sup>

<sup>a</sup>*Key Laboratory for Advanced Materials, School of Chemistry & Molecular Engineering, East China University of Science and Technology, Shanghai 200237, P. R. China. E-mail: liujingang@ecust.edu.cn.*

<sup>b</sup>*Shenzhen Key Lab of Functional Polymer, College of Chemistry and Environmental Engineering, Shenzhen University, Shenzhen 518060, P. R. China*

<sup>c</sup>*Key Lab of Resource Chemistry of Ministry of Education & Shanghai Key Lab of Rare Earth Functional Materials, Shanghai Normal University, Shanghai 200234, P. R. China*

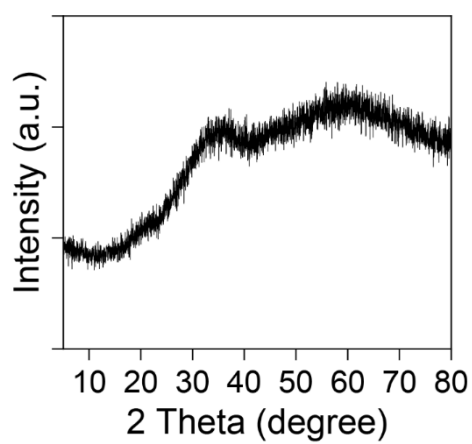

**Fig. S1** XRD pattern of CuPO NPs.

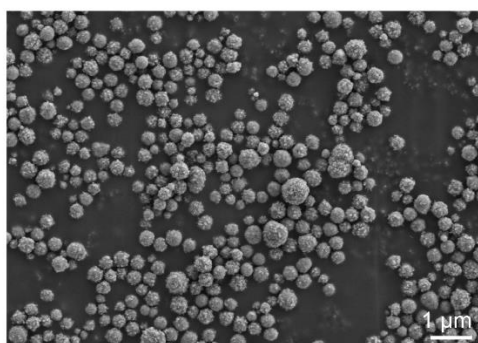

**Fig. S2** SEM image of CuPO NPs. Scale bar: 1 μm.

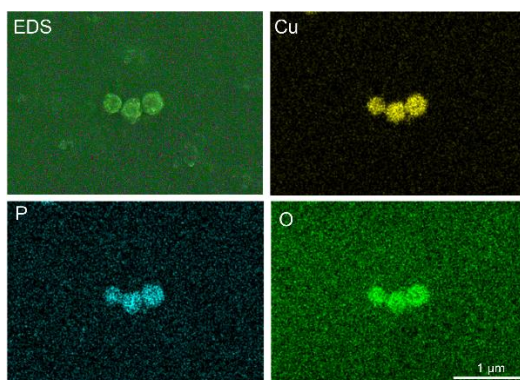

**Fig. S3** EDS elemental mapping images of CuPO NPs. Cu, yellow; P, blue; and O, green. Scale bar: 1 μm.

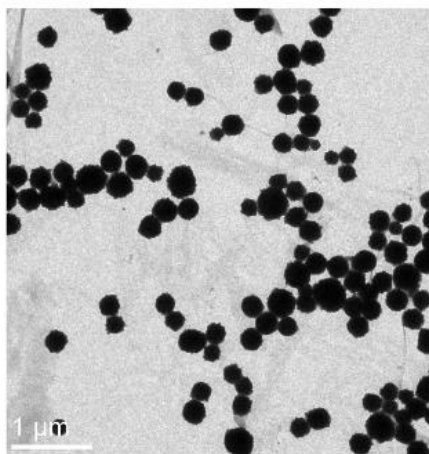

**Fig. S4** A larger field view of TEM of CPMF.

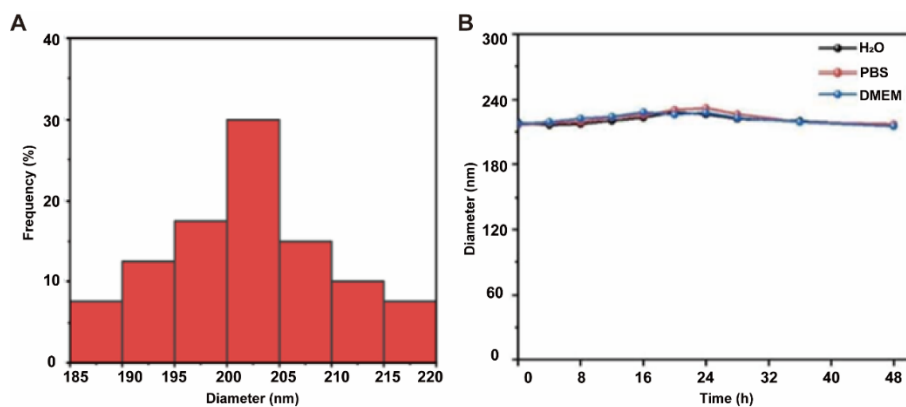

**Fig. S5** (A) Corresponding particle size distribution maps of CPMF nanoplateform. (B) Hydrodynamic size variation in 48 h of CPMF nanoplateform. CPMF: CuPO@PDA@MnCO@FA.

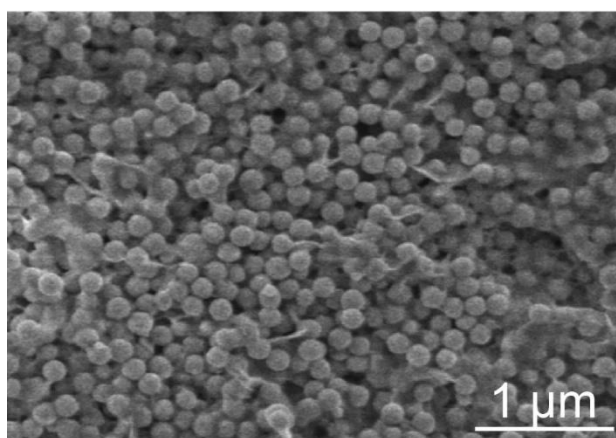

**Fig. S6** SEM image of CPMF.

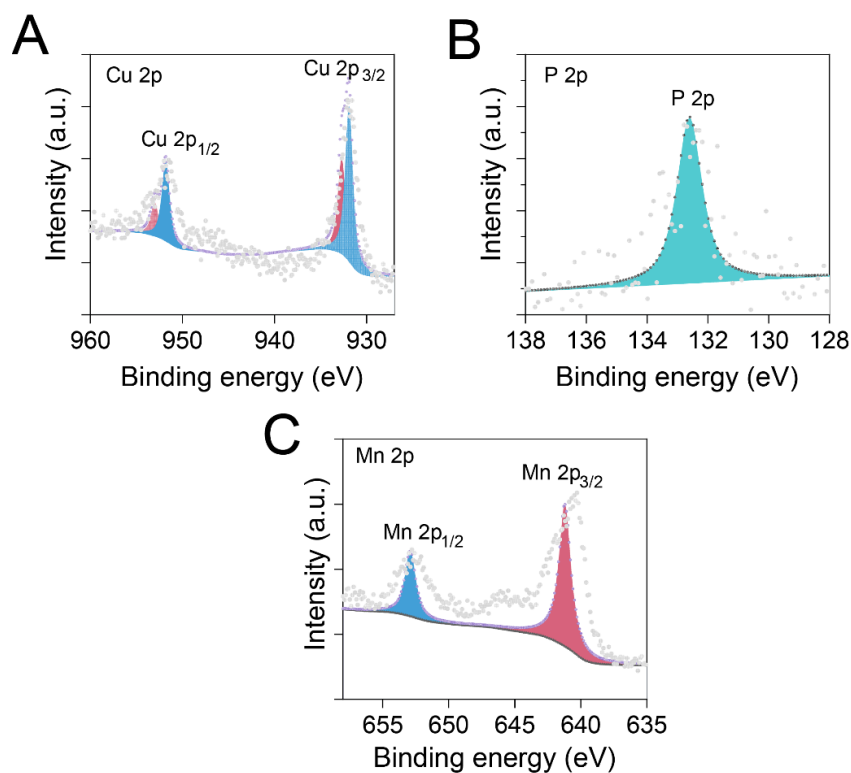

**Fig. S7** (A) XPS high-resolution Cu 2p, (B) high-resolution P 2p, (C) high-resolution Mn 2p of CPMF.

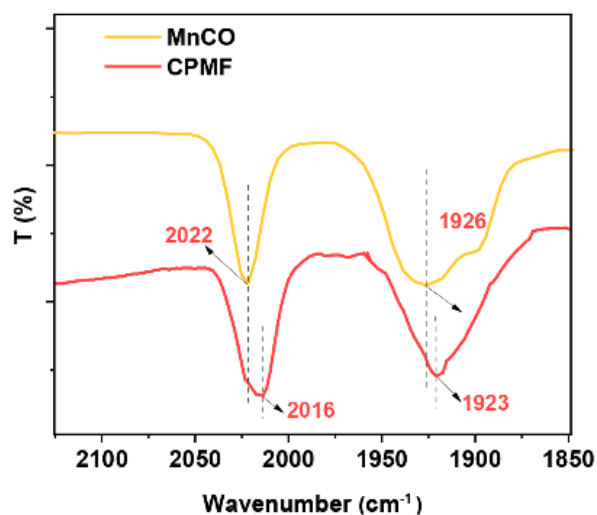

**Fig. S8** The enlarged FT-IR spectra of MnCO and CPMF. CPMF: CuPO@PDA@MnCO@FA.

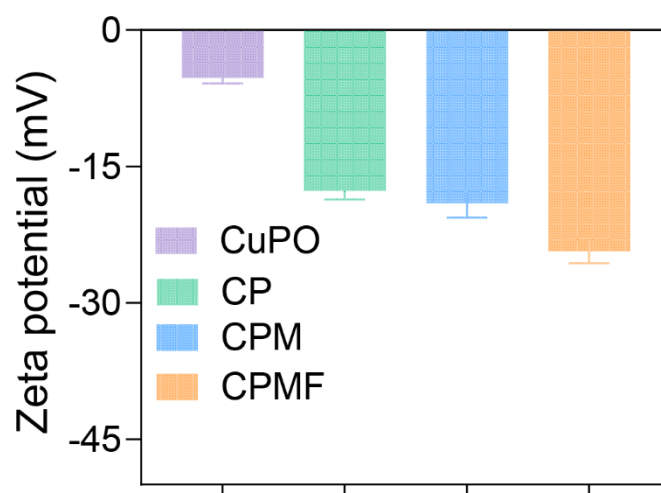

**Fig. S9** Zeta potential of CuPO, CP, CPM, and CPMF. CP: CuPO@PDA, CPM: CuPO@PDA@MnCO, CPMF: CuPO@PDA@MnCO@FA.

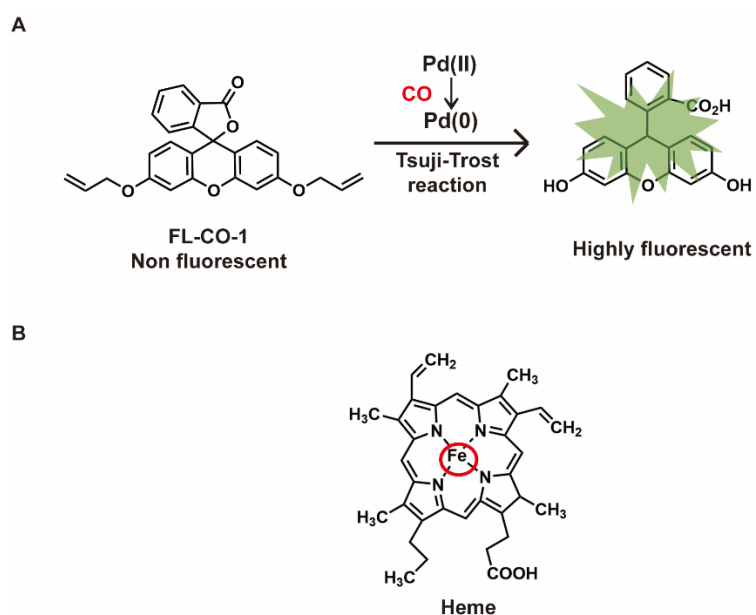

**Fig. S10** (A) Schematic diagram of the mechanism of CO detection by the FL-CO-1 probe. (B) Structural formula of hemoglobin.

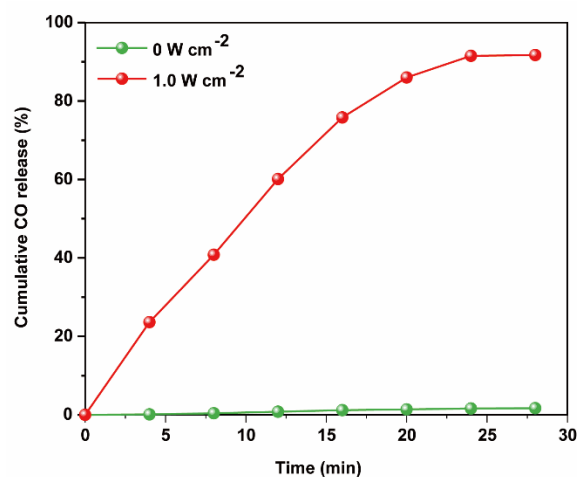

**Fig. S11** Cumulative CO release curves under 808 nm light irradiation (0, 1.0 W cm<sup>-2</sup>).

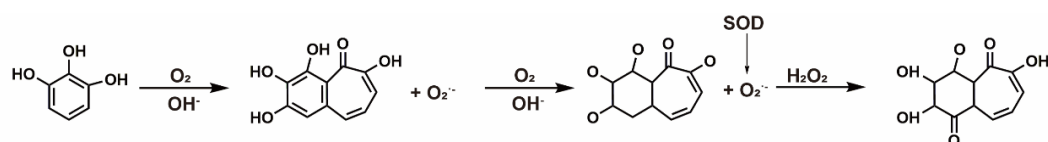

**Fig. S12** Schematic diagram of the principle of SOD determination by o-phenylenetriol.

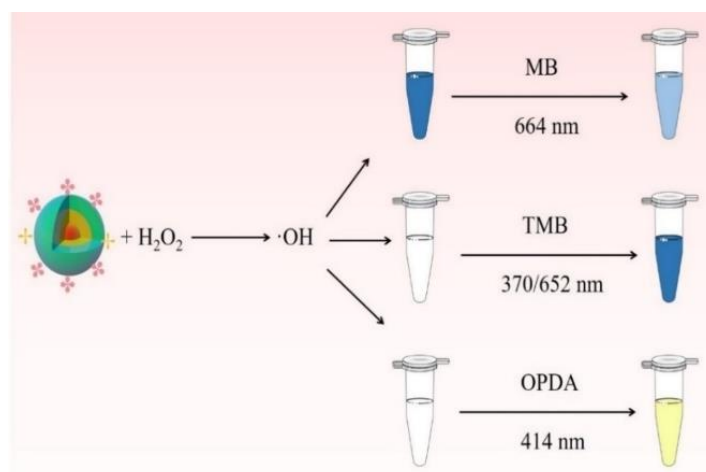

**Fig. S13** Schematic diagram of the CPMF nanoplatform, a POD-like enzyme, catalyzing the decomposition of H<sub>2</sub>O<sub>2</sub> to generate •OH that is detected by MB, TMB and OPDA indicators, respectively. CPMF: CuPO@PDA@MnCO@FA.

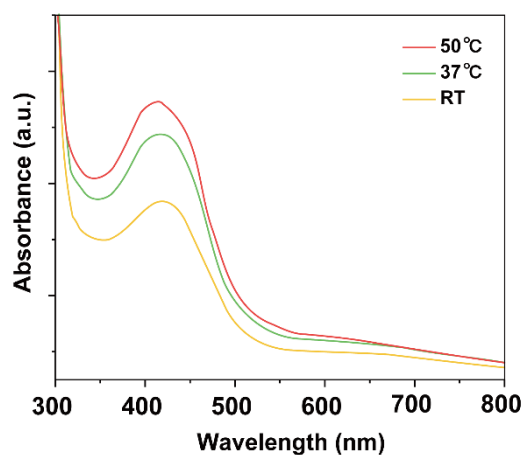

**Fig. S14** UV-vis absorption spectra of oxOPDA with the addition of CPMF NPs ( $0.2 \text{ mg mL}^{-1}$ ) and  $\text{H}_2\text{O}_2$  (10 mM) at different temperatures. CPMF:  $\text{CuPO@PDA@MnCO@FA}$ .

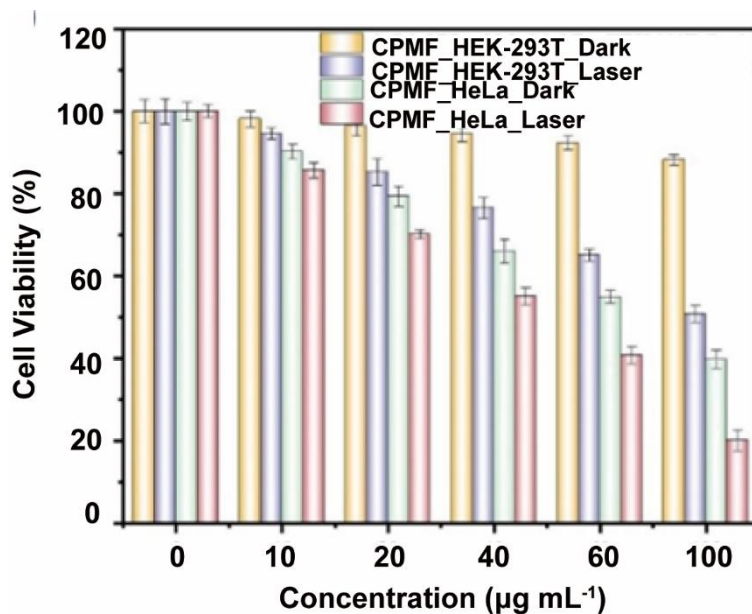

**Fig. S15** Comparison of cell survival after CPMF treatment of HeLa and HEK-293T cells under dark and 808 nm light irradiation, respectively. CPMF:  $\text{CuPO@PDA@MnCO@FA}$ .

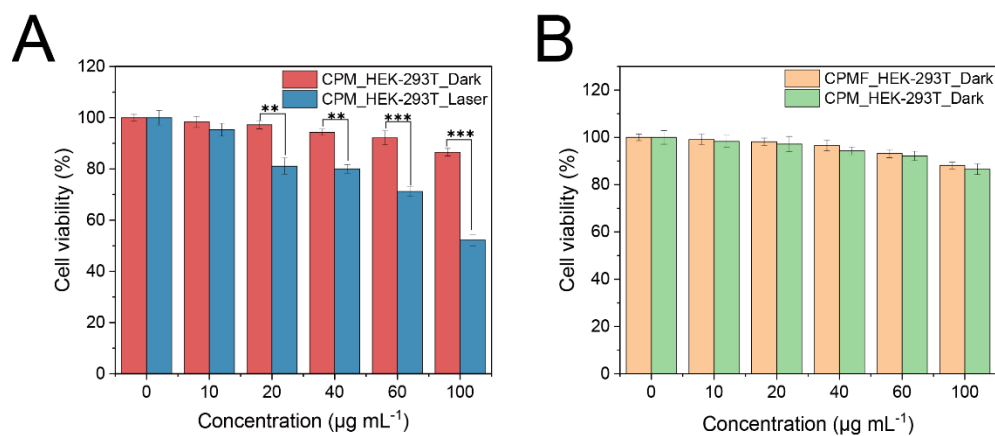

**Fig. S16** (A) Comparison of cell survival after CPM treatment of HEK-293T cells under dark and 808 nm light irradiation, respectively. (B) Comparison of cell survival after CPM and CPMF treatment of HEK-293T cells under dark. CPMF: CuPO@PDA@MnCO@FA.
